# Supplementary material
Source: MDPI journal article supplement (https://www.mdpi.com/2071-1050/6/3/1504)
Supplement: s1 [file s1]

## Sheet: IPA-Water
	StandardOrder	Run Order	PtCentral	Block	Temperature	Particle Size	Time	Solvent	mg GAE/g	mmolTE/g oat
	17	1	1	1	30	0.5	20	-1	0.470833	7.08446
	29	2	1	1	30	0.5	60	1	1.69917	31.0993								Temperature	Particle	Solvent	Time
	10	3	1	1	50	0.5	20	1	1.4025	19.3066								50	0.5	-1	60
	12	4	1	1	50	2	20	1	0.5975	10.755							Término	Coef
	7	5	1	1	30	2	60	-1	0.449167	1.87067							Constante	27.3536	27.3536
	18	6	1	1	50	0.5	20	-1	0.514167	5.517							Temperature	-0.379308	-18.9654
	22	7	1	1	50	0.5	60	-1	0.589167	14.1058							Particle Size	-9.27887	-4.63943
	30	8	1	1	50	0.5	60	1	1.66583	28.2996							Time	-0.297471	-17.8483
	16	9	1	1	50	2	60	1	0.974167	9.5719							Solvent	8.18486	-8.18486
	14	10	1	1	50	0.5	60	1	1.54583	25.8246							Temperature*Particle Size	0.147348	3.6837
	32	11	1	1	50	2	60	1	0.8475	11.1017							Temperature*Time	0.0115269	34.5807
	28	12	1	1	50	2	20	1	0.809167	6.62577							Temperature*Solvent	0.01998	-0.999
	21	13	1	1	30	0.5	60	-1	0.4375	2.68346							Particle Size*Time	0.068259	2.04777
	2	14	1	1	50	0.5	20	-1	0.544167	3.21757							Particle Size*Solvent	-5.62404	2.81202
	1	15	1	1	30	0.5	20	-1	0.539167	4.89055							Time*Solvent	0.211273	-12.6764
	6	16	1	1	50	0.5	60	-1	0.864167	13.2218							Temperature*Particle Size*Time	-0.00389973	-5.84959
	11	17	1	1	30	2	20	1	0.5975	8.57027							Temperature*Particle Size*Solvent	0.053662	-1.34155
	26	18	1	1	50	0.5	20	1	1.59917	18.9293							Temperature*Time*Solvent	-0.00478119	14.3436
	24	19	1	1	50	2	60	-1	0.5725	3.12623							Particle Size*Time*Solvent	-0.056884	1.70652
	20	20	1	1	50	2	20	-1	0.4675	1.45087							Temperature*Particle Size*Time*	0.00157297	2.35946
	31	21	1	1	30	2	60	1	0.640833	6.32051							Solvent		18.3829
	5	22	1	1	30	0.5	60	-1	0.725833	6.1698
	27	23	1	1	30	2	20	1	0.5975	5.42914
	15	24	1	1	30	2	60	1	0.695833	7.62427
	13	25	1	1	30	0.5	60	1	1.5525	19.9803
	9	26	1	1	30	0.5	20	1	1.66583	25.8504
	25	27	1	1	30	0.5	20	1	1.87583	18.2725
	19	28	1	1	30	2	20	-1	0.414167	6.08216
	3	29	1	1	30	2	20	-1	0.454167	1.01782
	23	30	1	1	30	2	60	-1	0.495833	-2.57703
	4	31	1	1	50	2	20	-1	0.510833	1.46259
	8	32	1	1	50	2	60	-1	0.5175	0.561161

## Sheet: EtOH-EG
	StandardOrder	Run Order	PtCentral	Block	Temperature	Particle Size	Time	Solvent	mg GAE/g	mmolTE/g			Source	DF	SS sec	F	P			Temperature	Particle	Solvent	Time
	12	1	1	1	50	0.5	20	1	1.60111	27.4705			Main effects	4	3551.07	21.13	0			50	0.075	1	60
	28	2	1	1	50	0.5	20	1	1.5937	27.1334			Temperature	1	10.66	0.25	0.621		Término	Coef	Value
	8	3	1	1	50	0.5	60	-1	0.584444	8.95628			Particle Size	1	1.72	0.04	0.842		Constante	14.7806	14.7806
	20	4	1	1	50	0.5	20	-1	0.467778	7.87561			Time	1	2.17	0.05	0.823		Temperature	0.256032	12.8016
	5	5	1	1	30	0.075	60	-1	0.382593	6.61125			Solvent	1	3536.53	84.17	0		Particle Size	20.5945	1.54459
	7	6	1	1	30	0.5	60	-1	0.584444	14.0982			2 interactions	6	562.36	2.23	0.094		Time	-0.002039	-0.12234
	9	7	1	1	30	0.075	20	1	1.6826	31.2128			Temperature*Particle Size	1	20.17	0.48	0.498		Solvent	17.1912	17.1912
	6	8	1	1	50	0.075	60	-1	0.478889	1.15189			Temperature*Time	1	0.38	0.01	0.925		Temperature*Particle Size	-0.76557	-2.87089
	18	9	1	1	50	0.075	20	-1	0.571481	16.3961			Temperature*Solvent	1	105.85	2.52	0.132		Temperature*Time	-0.00227227	-6.81681
	27	10	1	1	30	0.5	20	1	1.38167	26.7809			Particle Size*Time	1	44.65	1.06	0.318		Temperature*Solvent	-0.111743	-5.58715
	21	11	1	1	30	0.075	60	-1	0.388148	8.18209			Particle Size*Solvent	1	189.45	4.51	0.05		Particle Size*Time	-0.11398	-0.51291
	4	12	1	1	50	0.5	20	-1	0.614074	18.2664			Time*Solvent	1	201.86	4.8	0.044		Particle Size*Solvent	-65.5139	-4.91354
	10	13	1	1	50	0.075	20	1	0.6691	37.2904			3 interactions	4	75.58	0.45	0.771		Time*Solvent	-0.231225	-13.8735
	11	14	1	1	30	0.5	20	1	1.26222	18.7773			Temperature*Particle Size*Time	1	5.55	0.13	0.721		Temperature*Particle Size*Time	0.0097981	2.20457
	22	15	1	1	50	0.075	60	-1	0.552963	7.82849			Temperature*Particle Size*Solvent	1	2.18	0.05	0.823		Temperature*Particle Size*Solvent	1.00899	3.78371
	31	16	1	1	30	0.5	60	1	1.53444	32.6934			Temperature*Time*Solvent	1	0.01	0	0.988		Temperature*Time*Solvent	0.0064576	19.3728
	25	17	1	1	30	0.075	20	1	0.6993	33.6697			Particle Size*Time*Solvent	1	67.85	1.61	0.222		Particle Size*Time*Solvent	1.22878	5.52951
	14	18	1	1	50	0.075	60	1	2.1937	32.9809			4 interactions	1	28.37	0.68	0.423		Temperature*Particle Size*Time*Solvent	-0.0221542	-4.98469
	13	19	1	1	30	0.075	60	1	1.50852	33.6352			Temperature*Particle Size*Time*Solvent	1	28.37	0.68	0.423			ORAC	37.5267
	17	20	1	1	30	0.075	20	-1	0.525185	10.0006			Residual Error	16	672.28
	29	21	1	1	30	0.075	60	1	1.87889	27.0957			Pure Error	16	672.28
	19	22	1	1	30	0.5	20	-1	0.3509	30.4244			Total	31	4889.67
	15	23	1	1	30	0.5	60	1	1.56037	34.0132										Temperature	Particle	Solvent	Time
	30	24	1	1	50	0.075	60	1	1.78074	42.0725										30	0.5	-1	20
	23	25	1	1	30	0.5	60	-1	0.441852	9.04287									Término	Coef	Value
	16	26	1	1	50	0.5	60	1	0.44	25.1339									Constante	14.7806	14.7806
	3	27	1	1	30	0.5	20	-1	0.471481	10.7007									Temperature	0.256032	7.68096
	26	28	1	1	50	0.075	20	1	0.8327	36.7009									Particle Size	20.5945	10.2973
	24	29	1	1	50	0.5	60	-1	0.662222	10.7957									Time	-0.002039	-0.04078
	2	30	1	1	50	0.075	20	-1	0.627037	7.6397									Solvent	17.1912	-17.1912
	32	31	1	1	50	0.5	60	1	0.44	47.43									Temperature*Particle Size	-0.76557	-11.4835
	1	32	1	1	30	0.075	20	-1	0.477037	9.71467									Temperature*Time	-0.00227227	-1.36336
																			Temperature*Solvent	-0.111743	3.35229
																			Particle Size*Time	-0.11398	-1.1398
																			Particle Size*Solvent	-65.5139	32.757
																			Time*Solvent	-0.231225	4.6245
																			Temperature*Particle Size*Time	0.0097981	2.93943
																			Temperature*Particle Size*Solvent	1.00899	-15.1349
																			Temperature*Time*Solvent	0.0064576	-3.87456
																			Particle Size*Time*Solvent	1.22878	-12.2878
																			Temperature*Particle Size*Time*Solvent	-0.0221542	6.64626
																				ORAC	20.5623

## Sheet: Coeff
		Definition	Coeficcients
			Factorial 1	Factorial 2
		Constant	27.3536	14.7806
		Temperature	-0.379308	0.256032
		Particle Size	-9.27887	20.5945
		Time	-0.297471	-0.002039
		Solvent	8.18486	17.1912
		Temperature*Particle Size	0.147348	-0.76557
		Temperature*Time	0.0115269	-0.00227227
		Temperature*Solvent	0.01998	-0.111743
		Particle Size*Time	0.068259	-0.11398
		Particle Size*Solvent	-5.62404	-65.5139
		Time*Solvent	0.211273	-0.231225
		Temperature*Particle Size*Time	-0.00389973	0.0097981
		Temperature*Particle Size*Solvent	0.053662	1.00899
		Temperature*Time*Solvent	-0.00478119	0.0064576
		Particle Size*Time*Solvent	-0.056884	1.22878
		Temperature*Particle Size*Time*Solvent	0.00157297	-0.0221542
